# Supplementary material for: Interface dipoles of Ir(ppy)3on Cu(111)
Source: Royal Society of Chemistry journal article supplement (doi:10.1039/c9nr00934e), 2019-01-01
Supplement: c9nr00934e1.pdf [file c9nr00934e1.pdf]

## Supplementary Material

### Interface Dipoles of Ir(ppy)<sub>3</sub> on Cu(111)

Fabian Queck,<sup>a</sup> Florian Albrecht,<sup>a,b</sup> Pingo Mutombo,<sup>c</sup> Ondrej Krejci,<sup>c,d</sup> Pavel Jelínek,<sup>c,e</sup>  
Alastair McLean<sup>f</sup> and Jascha Repp<sup>a</sup>

<sup>a</sup> Department of Physics, University of Regensburg, 95053 Regensburg, Germany; Email: [fabian.queck@ur.de](mailto:fabian.queck@ur.de).

<sup>b</sup> Present address: IBM Research, Zurich, 8803 Rüschlikon, Switzerland.

<sup>c</sup> Institute of Physics, Academy of Sciences of the Czech Republic, Cukrovarnická 10, CZ-162000, Prague, Czech Republic.

<sup>d</sup> Second affiliation: Department of Applied Physics, Aalto University, P.O. Box 11000, FI-00076 Aalto.

<sup>e</sup> Second affiliation: Regional Centre of Advanced Technologies and Materials, Palacký University, Šlechtitelů 27, 78371 Olomouc, Czech Republic.

<sup>f</sup> Department of Physics, Engineering Physics and Astronomy, Queen's University, Kingston, ON, Canada, K7L3N6; E-mail: [mcleana@queensu.ca](mailto:mcleana@queensu.ca).

## STM overview images

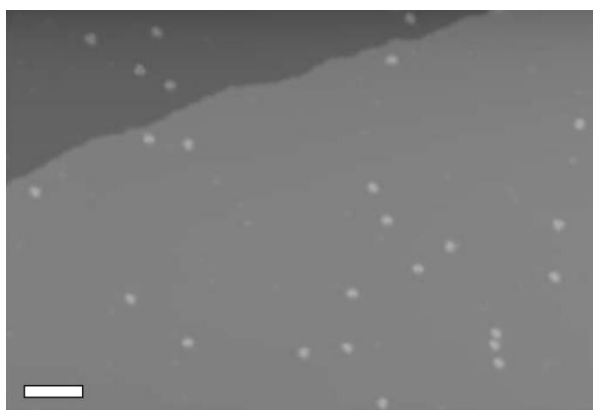

Fig. S1 STM overview with low coverage of Ir(ppy)<sub>3</sub> on Cu(111). Image details:  $I = 2$  pA,  $V = 100$  mV. Scale bar 100 Å.

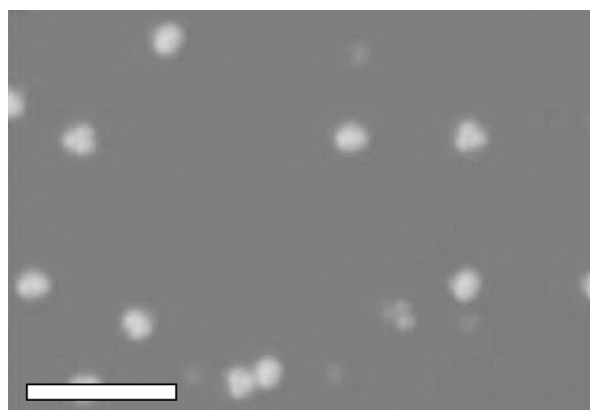

Fig. S2 STM image showing the different alignments of Ir(ppy)<sub>3</sub> on Cu(111). Image details:  $I = 2$  pA,  $V = 50$  mV. Scale bar 100 Å.

## Adsorption angle determination

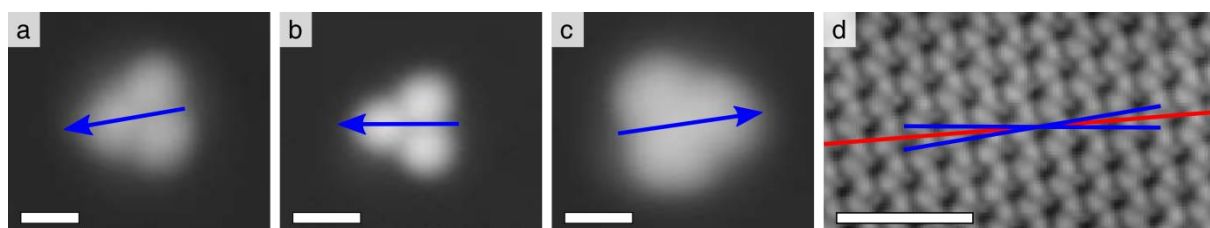

Fig. S3 (a to c) different orientations of Ir(ppy)<sub>3</sub> on Cu(111). (d) Drag-pattern of a Cu adatom on Cu(111), from which the substrate orientation becomes apparent. An analysis of the apparent orientation of 18 different molecules reveals (apart from two outliers) angles of  $\pm 6^\circ$  (a,b) and equivalents (c) with respect to a high-symmetry direction of the underlying Cu(111) substrate (d, red). Image details: (a to c)  $I = 2$  pA,  $V = 0.1$  V; (d)  $I = 2.1$   $\mu$ A,  $V = 0.1$  V. Scale bar 10 Å.
